# Supplementary material for: Characterization of Transcriptional Responses to Genomovirus Infection of the White Mold Fungus, Sclerotinia sclerotiorum
Source: MDPI journal article supplement (doi:10.3390/v14091892), 2022-08-27
Supplement: s1 [file s1]

## Supplemental Data

Table S1. Results from raw RNA-Seq libraries after trimming, aligning to the *S. sclerotiorum* genome, and count annotation by subread. Less than 0.01% of reads for each library were removed after trimming. 65.61%-72.91% of all raw reads were aligned to the *S. sclerotiorum* genome by HISAT2 while 49.4%-74.5% of those genes were correctly aligned to the *S. sclerotiorum* annotation file. Genome and annotation files were both acquired from the JGI MycoCosm database (45).

| Library  | Counts     | Trimmed Counts | Percent trimmed | HISAT2 Alignment counts | HISAT2 Alignment % | Subread assignment counts | Subread assignment % |
|----------|------------|----------------|-----------------|-------------------------|--------------------|---------------------------|----------------------|
| DK3_1_1  | 26,379,991 | 26,379,211     | 2.96E-03        | 26,379,211              | 72.91              | 37,435,058                | 49.4                 |
| DK3_1_2  | 26,379,991 | 26,379,211     |                 |                         |                    |                           |                      |
| DK3_2_1  | 24,855,157 | 24,854,390     | 3.09E-03        | 24,854,390              | 68.59              | 41,296,229                | 74.9                 |
| DK3_2_2  | 24,855,157 | 24,854,390     |                 |                         |                    |                           |                      |
| DK3_3_1  | 25,929,565 | 25,928,732     | 3.21E-03        | 25,928,732              | 70.83              | 39,568,260                | 59.4                 |
| DK3_3_2  | 25,929,565 | 25,928,732     |                 |                         |                    |                           |                      |
| DK3_4_1  | 24,875,286 | 24,874,424     | 3.47E-03        | 24,874,424              | 69.09              | 39,860,413                | 69.0                 |
| DK3_4_2  | 24,875,286 | 24,874,424     |                 |                         |                    |                           |                      |
| DK3V_1_1 | 24,674,643 | 24,673,536     | 4.49E-03        | 24,673,536              | 66.56              | 38,609,304                | 70.9                 |
| DK3V_1_2 | 24,674,643 | 24,673,536     |                 |                         |                    |                           |                      |
| DK3V_2_1 | 22,661,345 | 22,660,729     | 2.72E-03        | 22,660,729              | 67.77              | 35,380,663                | 67.8                 |
| DK3V_2_2 | 22,661,345 | 22,660,729     |                 |                         |                    |                           |                      |
| DK3V_3_1 | 22,070,687 | 22,069,659     | 4.66E-03        | 22,069,659              | 65.61              | 33,641,762                | 73.0                 |
| DK3V_3_2 | 22,070,687 | 22,069,659     |                 |                         |                    |                           |                      |
| DK3V_4_1 | 22,093,719 | 22,092,965     | 3.41E-03        | 22,092,965              | 66.35              | 33,869,492                | 72.2                 |
| DK3V_4_2 | 22,093,719 | 22,092,965     |                 |                         |                    |                           |                      |

Table S2. GO Molecular functions enrichments calculated by FungiDB. Up and downregulated genes were separated into individual lists before entering into FungiDB search strategies. A larger number of enriched GO IDs were characterized with downregulated genes. DNA-related upregulated genes and polysaccharide/carbohydrate binding downregulated genes would be further investigated for their roles in cell cycle progression, viral lifecycle, and loss of pathogenicity. Cutoff for FDR & Bonferroni adjustments were chosen as  $P \leq 5.00E-2$ .

| ID         | Name                                  | Bgd  | count | % bgd | Fold enrichment | Odds | P        | FDR      | Bonferroni | Reg. |
|------------|---------------------------------------|------|-------|-------|-----------------|------|----------|----------|------------|------|
| GO:0140097 | catalytic activity, acting on DNA     | 105  | 52    | 49.5  | 2.08            | 3.21 | 7.26E-09 | 7.35E-06 | 7.35E-06   | UP   |
| GO:0003677 | DNA binding                           | 539  | 181   | 33.6  | 1.41            | 1.69 | 5.78E-08 | 2.92E-05 | 5.85E-05   | UP   |
| GO:0008094 | ATP-dependent activity, acting on DNA | 36   | 23    | 63.9  | 2.68            | 5.73 | 3.43E-07 | 0.000116 | 0.000348   | UP   |
| GO:0043167 | ion binding                           | 1895 | 517   | 27.3  | 1.15            | 1.29 | 2.39E-05 | 0.00573  | 0.024233   | UP   |
| GO:0003678 | DNA helicase activity                 | 23   | 15    | 65.2  | 2.74            | 6.05 | 2.83E-05 | 0.00573  | 0.028651   | UP   |

| ID         | Name                                                        | Bgd  | count | % bgd | Fold enrichment | Odds  | P        | FDR      | Bonferroni | Reg. |
|------------|-------------------------------------------------------------|------|-------|-------|-----------------|-------|----------|----------|------------|------|
| GO:0003824 | catalytic activity                                          | 3133 | 927   | 29.6  | 1.17            | 1.48  | 2.56E-13 | 3.09E-10 | 3.09E-10   | DOWN |
| GO:0030248 | cellulose binding                                           | 24   | 21    | 87.5  | 3.46            | 20.88 | 2.42E-10 | 1.46E-07 | 2.91E-07   | DOWN |
| GO:0030247 | polysaccharide binding                                      | 28   | 23    | 82.1  | 3.24            | 13.73 | 4.26E-10 | 1.71E-07 | 5.13E-07   | DOWN |
| GO:0008135 | translation factor activity, RNA binding                    | 53   | 32    | 60.4  | 2.39            | 4.56  | 6.28E-08 | 1.77E-05 | 7.57E-05   | DOWN |
| GO:0003743 | translation initiation factor activity                      | 37   | 25    | 67.6  | 2.67            | 6.22  | 7.34E-08 | 1.77E-05 | 8.85E-05   | DOWN |
| GO:0090079 | translation regulator activity, nucleic acid binding        | 54   | 32    | 59.3  | 2.34            | 4.35  | 1.17E-07 | 2.35E-05 | 0.000141   | DOWN |
| GO:0016829 | lyase activity                                              | 133  | 61    | 45.9  | 1.81            | 2.55  | 1.78E-07 | 3.07E-05 | 0.000215   | DOWN |
| GO:0045182 | translation regulator activity                              | 56   | 32    | 57.1  | 2.26            | 3.99  | 3.76E-07 | 5.67E-05 | 0.000453   | DOWN |
| GO:0030246 | carbohydrate binding                                        | 60   | 32    | 53.3  | 2.11            | 3.41  | 2.97E-06 | 0.000399 | 0.003588   | DOWN |
| GO:0016830 | carbon-carbon lyase activity                                | 46   | 26    | 56.5  | 2.23            | 3.88  | 6.18E-06 | 0.000746 | 0.007457   | DOWN |
| GO:0016667 | oxidoreductase activity, acting on a sulfur group of donors | 28   | 18    | 64.3  | 2.54            | 5.35  | 1.50E-05 | 0.001643 | 0.018074   | DOWN |
| GO:0016491 | oxidoreductase activity                                     | 727  | 230   | 31.6  | 1.25            | 1.42  | 3.11E-05 | 0.003122 | 0.037465   | DOWN |

Table S3. GO Biological processes enrichments calculated by FungiDB. Up and downregulated genes were separated into individual lists before entering into FungiDB search strategies. Similar to the GO Molecular functions search, a larger number of enriched GO IDs were characterized with downregulated genes. Of interest, the upregulated genes relating to the cell cycle and DNA replication/repair would be investigated alongside the downregulated genes relating to small molecule metabolic processes and oxoacid metabolism for their potential roles in oxalate biosynthesis and metabolism. Cutoff for FDR & Bonferroni adjustments were chosen as  $P \leq 5.00E-2$ .

| ID         | Name                            | Bgd | count | % bgd | Fold enrichment | Odds | P        | FDR      | Bonferroni | Reg. |
|------------|---------------------------------|-----|-------|-------|-----------------|------|----------|----------|------------|------|
| GO:0007049 | cell cycle                      | 153 | 79    | 51.6  | 2.17            | 3.53 | 4.89E-14 | 5.64E-11 | 1.05E-10   | UP   |
| GO:0051276 | chromosome organization         | 121 | 67    | 55.4  | 2.33            | 4.09 | 5.25E-14 | 5.64E-11 | 1.13E-10   | UP   |
| GO:0006259 | DNA metabolic process           | 248 | 106   | 42.7  | 1.8             | 2.48 | 1.71E-11 | 1.23E-08 | 3.68E-08   | UP   |
| GO:0006310 | DNA recombination               | 61  | 39    | 63.9  | 2.69            | 5.78 | 2.62E-11 | 1.41E-08 | 5.63E-08   | UP   |
| GO:0000278 | mitotic cell cycle              | 84  | 48    | 57.1  | 2.4             | 4.36 | 4.62E-11 | 1.99E-08 | 9.94E-08   | UP   |
| GO:0022402 | cell cycle process              | 123 | 62    | 50.4  | 2.12            | 3.34 | 1.01E-10 | 3.62E-08 | 2.17E-07   | UP   |
| GO:1903047 | mitotic cell cycle process      | 77  | 44    | 57.1  | 2.4             | 4.35 | 2.99E-10 | 9.19E-08 | 6.43E-07   | UP   |
| GO:0006974 | response to DNA damage stimulus | 170 | 77    | 45.3  | 1.9             | 2.73 | 4.26E-10 | 1.14E-07 | 9.14E-07   | UP   |
| GO:0006281 | DNA repair                      | 152 | 70    | 46.1  | 1.94            | 2.81 | 1.10E-09 | 2.64E-07 | 2.37E-06   | UP   |
| GO:0006260 | DNA replication                 | 83  | 45    | 54.2  | 2.28            | 3.87 | 1.92E-09 | 4.12E-07 | 4.12E-06   | UP   |
| GO:0000280 | nuclear division                | 52  | 31    | 59.6  | 2.5             | 4.79 | 3.31E-08 | 6.47E-06 | 7.11E-05   | UP   |
| GO:0006261 | DNA-dependent DNA replication   | 39  | 25    | 64.1  | 2.69            | 5.79 | 9.53E-08 | 1.71E-05 | 0.000205   | UP   |
| GO:0000003 | reproduction                    | 55  | 31    | 56.4  | 2.37            | 4.19 | 1.99E-07 | 3.13E-05 | 0.000427   | UP   |
| GO:0071103 | DNA conformation change         | 33  | 22    | 66.7  | 2.8             | 6.47 | 2.04E-07 | 3.13E-05 | 0.000439   | UP   |
| GO:0051716 | cellular response to stimulus   | 414 | 142   | 34.3  | 1.44            | 1.73 | 4.37E-07 | 6.26E-05 | 0.000939   | UP   |

| ID         | Name                                           | Bgd  | count | % bgd | Fold enrichment | Odds  | P        | FDR      | Bonferroni | Reg. |
|------------|------------------------------------------------|------|-------|-------|-----------------|-------|----------|----------|------------|------|
| GO:0033554 | cellular response to stress                    | 260  | 96    | 36.9  | 1.55            | 1.93  | 9.55E-07 | 0.000128 | 0.002052   | UP   |
| GO:0051321 | meiotic cell cycle                             | 38   | 23    | 60.5  | 2.54            | 4.96  | 1.38E-06 | 0.000166 | 0.002972   | UP   |
| GO:0006302 | double-strand break repair                     | 43   | 25    | 58.1  | 2.44            | 4.5   | 1.39E-06 | 0.000166 | 0.002979   | UP   |
| GO:0048285 | organelle fission                              | 59   | 31    | 52.5  | 2.21            | 3.59  | 1.58E-06 | 0.000171 | 0.003404   | UP   |
| GO:0022414 | reproductive process                           | 51   | 28    | 54.9  | 2.31            | 3.95  | 1.60E-06 | 0.000171 | 0.003429   | UP   |
| GO:0000724 | homologous recombination                       | 27   | 18    | 66.7  | 2.8             | 6.46  | 2.71E-06 | 0.000278 | 0.00583    | UP   |
| GO:1903046 | meiotic cell cycle process                     | 32   | 20    | 62.5  | 2.63            | 5.39  | 3.37E-06 | 0.00032  | 0.007238   | UP   |
| GO:0050896 | response to stimulus                           | 449  | 148   | 33    | 1.39            | 1.63  | 3.43E-06 | 0.00032  | 0.007361   | UP   |
| GO:0007059 | chromosome segregation                         | 58   | 30    | 51.7  | 2.17            | 3.47  | 3.57E-06 | 0.00032  | 0.007674   | UP   |
| GO:0010564 | regulation of cell cycle process               | 61   | 31    | 50.8  | 2.14            | 3.35  | 3.99E-06 | 0.000343 | 0.008584   | UP   |
| GO:0006270 | DNA replication initiation                     | 15   | 12    | 80    | 3.36            | 12.89 | 6.97E-06 | 0.000576 | 0.014987   | UP   |
| GO:0000819 | sister chromatid segregation                   | 26   | 17    | 65.4  | 2.75            | 6.1   | 7.72E-06 | 0.000604 | 0.016582   | UP   |
| GO:0006950 | response to stress                             | 285  | 100   | 35.1  | 1.47            | 1.78  | 7.87E-06 | 0.000604 | 0.016921   | UP   |
| GO:1901987 | regulation of cell cycle phase transition      | 49   | 26    | 53.1  | 2.23            | 3.66  | 8.69E-06 | 0.000644 | 0.018679   | UP   |
| GO:0051301 | cell division                                  | 55   | 28    | 50.9  | 2.14            | 3.36  | 1.12E-05 | 0.0008   | 0.024009   | UP   |
| GO:0051726 | regulation of cell cycle                       | 78   | 36    | 46.2  | 1.94            | 2.78  | 1.17E-05 | 0.000813 | 0.025194   | UP   |
| GO:0000725 | recombinational repair                         | 29   | 18    | 62.1  | 2.61            | 5.28  | 1.21E-05 | 0.000814 | 0.026044   | UP   |
| GO:0006298 | mismatch repair                                | 12   | 10    | 83.3  | 3.5             | 16.1  | 2.32E-05 | 0.001513 | 0.049932   | UP   |
| GO:0044281 | small molecule metabolic process               | 582  | 237   | 40.7  | 1.61            | 2.18  | 1.31E-17 | 3.02E-14 | 3.02E-14   | DOWN |
| GO:0009056 | catabolic process                              | 547  | 220   | 40.2  | 1.59            | 2.12  | 1.19E-15 | 1.38E-12 | 2.76E-12   | DOWN |
| GO:0005975 | carbohydrate metabolic process                 | 298  | 134   | 45    | 1.78            | 2.52  | 4.39E-14 | 3.38E-11 | 1.01E-10   | DOWN |
| GO:0043436 | oxoacid metabolic process                      | 317  | 140   | 44.2  | 1.74            | 2.44  | 6.66E-14 | 3.85E-11 | 1.54E-10   | DOWN |
| GO:0006082 | organic acid metabolic process                 | 321  | 141   | 43.9  | 1.74            | 2.42  | 9.11E-14 | 4.21E-11 | 2.11E-10   | DOWN |
| GO:0019752 | carboxylic acid metabolic process              | 311  | 137   | 44.1  | 1.74            | 2.43  | 1.60E-13 | 6.16E-11 | 3.70E-10   | DOWN |
| GO:1901575 | organic substance catabolic process            | 493  | 195   | 39.6  | 1.56            | 2.04  | 4.15E-13 | 1.37E-10 | 9.59E-10   | DOWN |
| GO:0044248 | cellular catabolic process                     | 408  | 166   | 40.7  | 1.61            | 2.12  | 1.75E-12 | 4.58E-10 | 4.05E-09   | DOWN |
| GO:1901564 | organonitrogen compound metabolic process      | 1326 | 438   | 33    | 1.3             | 1.6   | 1.78E-12 | 4.58E-10 | 4.12E-09   | DOWN |
| GO:0008152 | metabolic process                              | 3212 | 933   | 29    | 1.15            | 1.42  | 5.57E-11 | 1.29E-08 | 1.29E-07   | DOWN |
| GO:0006091 | generation of precursor metabolites and energy | 86   | 50    | 58.1  | 2.3             | 4.18  | 8.46E-11 | 1.78E-08 | 1.95E-07   | DOWN |
| GO:0008150 | biological process                             | 4363 | 1215  | 27.8  | 1.1             | 1.4   | 6.76E-10 | 1.30E-07 | 1.56E-06   | DOWN |
| GO:1901566 | organonitrogen compound biosynthetic process   | 597  | 215   | 36    | 1.42            | 1.75  | 8.87E-10 | 1.58E-07 | 2.05E-06   | DOWN |
| GO:0043603 | cellular amide metabolic process               | 300  | 121   | 40.3  | 1.59            | 2.06  | 4.02E-09 | 6.64E-07 | 9.30E-06   | DOWN |
| GO:0044262 | cellular carbohydrate metabolic process        | 76   | 43    | 56.6  | 2.24            | 3.91  | 5.67E-09 | 8.74E-07 | 1.31E-05   | DOWN |
| GO:0044237 | cellular metabolic process                     | 2383 | 703   | 29.5  | 1.17            | 1.38  | 8.11E-09 | 1.17E-06 | 1.87E-05   | DOWN |
| GO:0009987 | cellular process                               | 3655 | 1030  | 28.2  | 1.11            | 1.35  | 1.03E-08 | 1.40E-06 | 2.37E-05   | DOWN |
| GO:0016052 | carbohydrate catabolic process                 | 134  | 64    | 47.8  | 1.89            | 2.76  | 1.28E-08 | 1.65E-06 | 2.97E-05   | DOWN |
| GO:0002181 | cytoplasmic translation                        | 33   | 24    | 72.7  | 2.87            | 7.96  | 1.39E-08 | 1.70E-06 | 3.22E-05   | DOWN |
| GO:0006518 | peptide metabolic process                      | 247  | 102   | 41.3  | 1.63            | 2.14  | 1.65E-08 | 1.90E-06 | 3.80E-05   | DOWN |
| GO:0043043 | peptide biosynthetic process                   | 229  | 96    | 41.9  | 1.66            | 2.19  | 1.79E-08 | 1.95E-06 | 4.14E-05   | DOWN |
| GO:0019637 | organophosphate metabolic process              | 266  | 108   | 40.6  | 1.6             | 2.08  | 1.86E-08 | 1.95E-06 | 4.29E-05   | DOWN |

| ID         | Name                                                     | Bgd  | count | % bgd | Fold enrichment | Odds  | P        | FDR      | Bonferroni | Reg. |
|------------|----------------------------------------------------------|------|-------|-------|-----------------|-------|----------|----------|------------|------|
| GO:0019693 | ribose phosphate metabolic process                       | 94   | 48    | 51.1  | 2.02            | 3.13  | 6.35E-08 | 6.38E-06 | 0.000147   | DOWN |
| GO:0006412 | translation                                              | 222  | 92    | 41.4  | 1.64            | 2.14  | 6.90E-08 | 6.64E-06 | 0.000159   | DOWN |
| GO:0046034 | ATP metabolic process                                    | 52   | 31    | 59.6  | 2.36            | 4.41  | 1.52E-07 | 1.41E-05 | 0.000352   | DOWN |
| GO:0006163 | purine nucleotide metabolic process                      | 83   | 43    | 51.8  | 2.05            | 3.22  | 1.81E-07 | 1.61E-05 | 0.000419   | DOWN |
| GO:0043604 | amide biosynthetic process                               | 255  | 101   | 39.6  | 1.56            | 1.99  | 2.32E-07 | 1.99E-05 | 0.000536   | DOWN |
| GO:0009150 | purine ribonucleotide metabolic process                  | 79   | 41    | 51.9  | 2.05            | 3.23  | 3.28E-07 | 2.71E-05 | 0.000758   | DOWN |
| GO:0071704 | organic substance metabolic process                      | 2590 | 745   | 28.8  | 1.14            | 1.32  | 3.41E-07 | 2.72E-05 | 0.000789   | DOWN |
| GO:0044282 | small molecule catabolic process                         | 101  | 49    | 48.5  | 1.92            | 2.83  | 3.58E-07 | 2.76E-05 | 0.000828   | DOWN |
| GO:0009168 | purine ribonucleoside monophosphate biosynthetic process | 18   | 15    | 83.3  | 3.29            | 14.86 | 3.92E-07 | 2.92E-05 | 0.000907   | DOWN |
| GO:1901565 | organonitrogen compound catabolic process                | 245  | 97    | 39.6  | 1.56            | 1.99  | 4.13E-07 | 2.98E-05 | 0.000954   | DOWN |
| GO:0006520 | cellular amino acid metabolic process                    | 205  | 84    | 41    | 1.62            | 2.1   | 4.59E-07 | 3.21E-05 | 0.001061   | DOWN |
| GO:0009259 | ribonucleotide metabolic process                         | 89   | 44    | 49.4  | 1.95            | 2.93  | 7.27E-07 | 4.94E-05 | 0.001681   | DOWN |
| GO:0006413 | translational initiation                                 | 31   | 21    | 67.7  | 2.68            | 6.26  | 7.84E-07 | 5.18E-05 | 0.001813   | DOWN |
| GO:0044271 | cellular nitrogen compound biosynthetic process          | 602  | 203   | 33.7  | 1.33            | 1.56  | 9.13E-07 | 5.86E-05 | 0.00211    | DOWN |
| GO:0072521 | purine-containing compound metabolic process             | 98   | 47    | 48    | 1.89            | 2.76  | 9.45E-07 | 5.90E-05 | 0.002184   | DOWN |
| GO:0009127 | purine nucleoside monophosphate biosynthetic process     | 17   | 14    | 82.4  | 3.25            | 13.87 | 1.30E-06 | 7.93E-05 | 0.003013   | DOWN |
| GO:0044275 | cellular carbohydrate catabolic process                  | 32   | 21    | 65.6  | 2.59            | 5.69  | 1.74E-06 | 0.000103 | 0.004018   | DOWN |
| GO:0005976 | polysaccharide metabolic process                         | 106  | 49    | 46.2  | 1.83            | 2.58  | 2.16E-06 | 0.000125 | 0.005002   | DOWN |
| GO:0072522 | purine-containing compound biosynthetic process          | 57   | 31    | 54.4  | 2.15            | 3.56  | 2.45E-06 | 0.000138 | 0.005661   | DOWN |
| GO:0006096 | glycolytic process                                       | 14   | 12    | 85.7  | 3.39            | 17.81 | 3.62E-06 | 0.000187 | 0.008354   | DOWN |
| GO:0006757 | ATP generation from ADP                                  | 14   | 12    | 85.7  | 3.39            | 17.81 | 3.62E-06 | 0.000187 | 0.008354   | DOWN |
| GO:0044247 | cellular polysaccharide catabolic process                | 14   | 12    | 85.7  | 3.39            | 17.81 | 3.62E-06 | 0.000187 | 0.008354   | DOWN |
| GO:0016051 | carbohydrate biosynthetic process                        | 33   | 21    | 63.6  | 2.51            | 5.21  | 3.64E-06 | 0.000187 | 0.00842    | DOWN |
| GO:0009179 | purine ribonucleoside diphosphate metabolic process      | 16   | 13    | 81.3  | 3.21            | 12.87 | 4.28E-06 | 0.000206 | 0.009898   | DOWN |
| GO:0046031 | ADP metabolic process                                    | 16   | 13    | 81.3  | 3.21            | 12.87 | 4.28E-06 | 0.000206 | 0.009898   | DOWN |
| GO:0009135 | purine nucleoside diphosphate metabolic process          | 16   | 13    | 81.3  | 3.21            | 12.87 | 4.28E-06 | 0.000206 | 0.009898   | DOWN |
| GO:0009126 | purine nucleoside monophosphate metabolic process        | 20   | 15    | 75    | 2.96            | 8.92  | 4.36E-06 | 0.000206 | 0.010081   | DOWN |
| GO:0046390 | ribose phosphate biosynthetic process                    | 64   | 33    | 51.6  | 2.04            | 3.18  | 5.53E-06 | 0.000256 | 0.012788   | DOWN |
| GO:0009156 | ribonucleoside monophosphate biosynthetic process        | 27   | 18    | 66.7  | 2.63            | 5.95  | 7.01E-06 | 0.000318 | 0.016196   | DOWN |
| GO:0055086 | nucleobase-containing small molecule metabolic process   | 183  | 73    | 39.9  | 1.58            | 2     | 8.19E-06 | 0.000358 | 0.018938   | DOWN |
| GO:0044264 | cellular polysaccharide metabolic process                | 44   | 25    | 56.8  | 2.24            | 3.92  | 8.22E-06 | 0.000358 | 0.018996   | DOWN |
| GO:0051156 | glucose 6-phosphate metabolic process                    | 11   | 10    | 90.9  | 3.59            | 29.66 | 9.00E-06 | 0.000385 | 0.020789   | DOWN |
| GO:0006164 | purine nucleotide biosynthetic process                   | 52   | 28    | 53.8  | 2.13            | 3.48  | 9.69E-06 | 0.000407 | 0.022392   | DOWN |
| GO:0006793 | phosphorus metabolic process                             | 465  | 158   | 34    | 1.34            | 1.57  | 1.01E-05 | 0.000415 | 0.023239   | DOWN |
| GO:0009117 | nucleotide metabolic process                             | 135  | 57    | 42.2  | 1.67            | 2.19  | 1.11E-05 | 0.00045  | 0.025635   | DOWN |
| GO:0009161 | ribonucleoside monophosphate metabolic process           | 30   | 19    | 63.3  | 2.5             | 5.14  | 1.19E-05 | 0.000468 | 0.027412   | DOWN |
| GO:0030243 | cellulose metabolic process                              | 13   | 11    | 84.6  | 3.34            | 16.32 | 1.23E-05 | 0.000468 | 0.028529   | DOWN |
| GO:0051275 | beta-glucan catabolic process                            | 13   | 11    | 84.6  | 3.34            | 16.32 | 1.23E-05 | 0.000468 | 0.028529   | DOWN |
| GO:0030245 | cellulose catabolic process                              | 13   | 11    | 84.6  | 3.34            | 16.32 | 1.23E-05 | 0.000468 | 0.028529   | DOWN |
| GO:0046939 | nucleotide phosphorylation                               | 15   | 12    | 80    | 3.16            | 11.87 | 1.39E-05 | 0.000504 | 0.032091   | DOWN |

| ID         | Name                                   | Bgd | count | % bgd | Fold enrichment | Odds  | P        | FDR      | Bonferroni | Reg. |
|------------|----------------------------------------|-----|-------|-------|-----------------|-------|----------|----------|------------|------|
| GO:0006165 | nucleoside diphosphate phosphorylation | 15  | 12    | 80    | 3.16            | 11.87 | 1.39E-05 | 0.000504 | 0.032091   | DOWN |
| GO:0002183 | cytoplasmic translational initiation   | 17  | 13    | 76.5  | 3.02            | 9.65  | 1.40E-05 | 0.000504 | 0.032274   | DOWN |
| GO:0006753 | nucleoside phosphate metabolic process | 136 | 57    | 41.9  | 1.66            | 2.16  | 1.45E-05 | 0.000514 | 0.033429   | DOWN |

Table S4. GO Cellular component enrichments calculated by fungiDB. Up and downregulated genes were separated into individual lists before entering into FungiDB search strategies. Among the upregulated genes, enrichments which are related to chromosomal regions seem to be enriched. Cutoff for FDR & Bonferroni adjustments were chosen as  $P \leq 5.00E-2$

| ID         | Name                                                   | Bgd  | count | % bgd | Fold | Odds  | P        | FDR      | Bonferroni | Reg. |
|------------|--------------------------------------------------------|------|-------|-------|------|-------|----------|----------|------------|------|
| GO:0005694 | chromosome                                             | 189  | 96    | 50.8  | 2.13 | 3.44  | 3.44E-16 | 1.85E-13 | 1.85E-13   | UP   |
| GO:0000793 | condensed chromosome                                   | 50   | 29    | 58    | 2.44 | 4.48  | 2.13E-07 | 5.72E-05 | 1.14E-04   | UP   |
| GO:0098687 | chromosomal region                                     | 67   | 33    | 49.3  | 2.07 | 3.15  | 4.75E-06 | 6.90E-04 | 2.56E-03   | UP   |
| GO:0044464 | obsolete cell part                                     | 1097 | 320   | 29.2  | 1.23 | 1.39  | 5.13E-06 | 6.90E-04 | 2.76E-03   | UP   |
| GO:0032300 | mismatch repair complex                                | 7    | 7     | 100   | 4.2  | inf   | 4.28E-05 | 4.19E-03 | 2.31E-02   | UP   |
| GO:0005657 | replication fork                                       | 19   | 13    | 68.4  | 2.87 | 6.98  | 4.68E-05 | 4.19E-03 | 2.52E-02   | UP   |
| GO:0016021 | integral component of membrane                         | 2000 | 537   | 26.9  | 1.13 | 1.25  | 1.09E-04 | 6.53E-03 | 5.85E-02   | UP   |
| GO:0000775 | chromosome, centromeric region                         | 41   | 21    | 51.2  | 2.15 | 3.39  | 1.25E-04 | 6.53E-03 | 6.72E-02   | UP   |
| GO:0031224 | intrinsic component of membrane                        | 2015 | 540   | 26.8  | 1.13 | 1.25  | 1.29E-04 | 6.53E-03 | 6.92E-02   | UP   |
| GO:0000779 | condensed chromosome, centromeric region               | 33   | 18    | 54.5  | 2.29 | 3.87  | 1.34E-04 | 6.53E-03 | 7.18E-02   | UP   |
| GO:0000776 | kinetochore                                            | 33   | 18    | 54.5  | 2.29 | 3.87  | 1.34E-04 | 6.53E-03 | 7.18E-02   | UP   |
| GO:0000790 | nuclear chromatin                                      | 28   | 16    | 57.1  | 2.4  | 4.3   | 1.52E-04 | 6.82E-03 | 8.18E-02   | UP   |
| GO:0000228 | nuclear chromosome                                     | 57   | 26    | 45.6  | 1.92 | 2.71  | 2.39E-04 | 9.89E-03 | 1.29E-01   | UP   |
| GO:0035861 | site of double-strand break                            | 9    | 7     | 77.8  | 3.27 | 11.25 | 9.70E-04 | 3.48E-02 | 5.22E-01   | UP   |
| GO:0090734 | site of DNA damage                                     | 9    | 7     | 77.8  | 3.27 | 11.25 | 9.70E-04 | 3.48E-02 | 5.22E-01   | UP   |
| GO:0005737 | cytoplasm                                              | 1791 | 608   | 33.9  | 1.34 | 1.77  | 1.87E-21 | 9.54E-19 | 9.54E-19   | DOWN |
| GO:0044424 | obsolete intracellular part                            | 610  | 248   | 40.7  | 1.61 | 2.18  | 2.58E-18 | 6.57E-16 | 1.31E-15   | DOWN |
| GO:0005829 | cytosol                                                | 289  | 136   | 47.1  | 1.86 | 2.75  | 2.96E-16 | 5.04E-14 | 1.51E-13   | DOWN |
| GO:0044444 | obsolete cytoplasmic part                              | 545  | 191   | 35    | 1.38 | 1.66  | 9.22E-08 | 1.18E-05 | 4.70E-05   | DOWN |
| GO:0031975 | envelope                                               | 228  | 84    | 36.8  | 1.46 | 1.76  | 5.98E-05 | 5.08E-03 | 3.05E-02   | DOWN |
| GO:0031967 | organelle envelope                                     | 228  | 84    | 36.8  | 1.46 | 1.76  | 5.98E-05 | 5.08E-03 | 3.05E-02   | DOWN |
| GO:0016282 | eukaryotic 43S preinitiation complex                   | 15   | 11    | 73.3  | 2.9  | 8.16  | 1.28E-04 | 6.46E-03 | 6.54E-02   | DOWN |
| GO:0005753 | mitochondrial proton-transporting ATP synthase complex | 11   | 9     | 81.8  | 3.23 | 13.34 | 1.38E-04 | 6.46E-03 | 7.06E-02   | DOWN |
| GO:0005852 | eukaryotic translation initiation factor 3 complex     | 13   | 10    | 76.9  | 3.04 | 9.88  | 1.39E-04 | 6.46E-03 | 7.10E-02   | DOWN |

| ID         | Name                                           | Bgd | count | % bgd | Fold | Odds  | P        | FDR      | Bonferroni | Reg. |
|------------|------------------------------------------------|-----|-------|-------|------|-------|----------|----------|------------|------|
| GO:0033290 | eukaryotic 48S preinitiation complex           | 13  | 10    | 76.9  | 3.04 | 9.88  | 1.39E-04 | 6.46E-03 | 7.10E-02   | DOWN |
| GO:0005740 | mitochondrial envelope                         | 189 | 70    | 37    | 1.46 | 1.76  | 2.01E-04 | 8.54E-03 | 1.02E-01   | DOWN |
| GO:0101031 | chaperone complex                              | 6   | 6     | 100   | 3.95 | inf   | 2.62E-04 | 9.53E-03 | 1.33E-01   | DOWN |
| GO:0005832 | chaperonin-containing T-complex                | 6   | 6     | 100   | 3.95 | inf   | 2.62E-04 | 9.53E-03 | 1.33E-01   | DOWN |
| GO:0005739 | mitochondrion                                  | 440 | 142   | 32.3  | 1.27 | 1.44  | 4.33E-04 | 1.47E-02 | 2.21E-01   | DOWN |
| GO:0031966 | mitochondrial membrane                         | 176 | 64    | 36.4  | 1.44 | 1.71  | 6.56E-04 | 2.09E-02 | 3.35E-01   | DOWN |
| GO:0005576 | extracellular region                           | 129 | 49    | 38    | 1.5  | 1.83  | 9.15E-04 | 2.75E-02 | 4.67E-01   | DOWN |
| GO:0045259 | proton-transporting ATP synthase complex       | 13  | 9     | 69.2  | 2.73 | 6.67  | 1.08E-03 | 3.06E-02 | 5.51E-01   | DOWN |
| GO:0098800 | inner mitochondrial membrane protein complex   | 36  | 18    | 50    | 1.98 | 2.97  | 1.21E-03 | 3.26E-02 | 6.19E-01   | DOWN |
| GO:0008541 | proteasome regulatory particle, lid subcomplex | 7   | 6     | 85.7  | 3.39 | 17.76 | 1.43E-03 | 3.66E-02 | 7.32E-01   | DOWN |
| GO:0005743 | mitochondrial inner membrane                   | 143 | 52    | 36.4  | 1.44 | 1.71  | 2.02E-03 | 4.91E-02 | 1.00E+00   | DOWN |

Table S5. Differentially expressed proteins related to DNA replication, repair, and the cell cycle. Annotation was determined via KEGG pathway annotations. FDR adjustment cutoff  $P \leq 5.00E-2$  used for determining significance.

| Gene Name                 | ID         | ID2             | Log2 Fold Change | Fold Change | Adjusted P |
|---------------------------|------------|-----------------|------------------|-------------|------------|
| <b>TOP3</b>               | SS1G_12655 | sscle_06g053170 | 1.16             | 2.24        | 1.06E-04   |
| <b>Separase</b>           | SS1G_07342 | sscle_06g049920 | 2.38             | 5.22        | 1.26E-27   |
| <b>RNase H2 subunit C</b> | SS1G_13856 | sscle_10g080650 | 1.66             | 3.09        | 2.74E-03   |
| <b>RAD51</b>              | SS1G_06782 | sscle_13g095360 | 1.01             | 2.01        | 6.18E-09   |
| <b>Putative XRS2</b>      | SS1G_02656 | sscle_04g036230 | NA               | NA          | NS         |
| <b>Putative RPA</b>       | SS1G_08173 | sscle_10g075210 | 1.33             | 2.51        | 5.46E-13   |
| <b>Putative RNase H</b>   | SS1G_02079 | sscle_01g003750 | -2.92            | -7.55       | 1.11E-03   |
| <b>Putative RAD54</b>     | SS1G_11894 | sscle_12g090630 | 1.22             | 2.34        | 2.88E-10   |
| <b>Putative RAD54</b>     | SS1G_12550 | sscle_06g053890 | 1.20             | 2.29        | 9.18E-08   |
| <b>Putative RAD52</b>     | SS1G_10638 | sscle_09g071050 | 1.06             | 2.09        | 3.75E-04   |
| <b>Putative RAD50</b>     | SS1G_12239 | sscle_05g042050 | 1.12             | 2.17        | 4.23E-09   |
| <b>Putative PCNA</b>      | SS1G_12686 | sscle_02g013610 | NA               | NA          | NS         |
| <b>Putative MRE11</b>     | SS1G_09567 | sscle_15g103930 | 1.32             | 2.50        | 6.24E-10   |
| <b>Putative Mps1</b>      | SS1G_01433 | sscle_01g008890 | 2.08             | 4.24        | 2.08E-22   |
| <b>Putative DSS1</b>      | SS1G_01104 | sscle_01g011380 | -0.74            | -1.67       | 7.17E-03   |
| <b>Putative Cyclin</b>    | SS1G_04347 | sscle_02g017440 | 3.06             | 8.34        | 4.18E-22   |
| <b>Putative Cyclin</b>    | SS1G_11572 | sscle_07g060970 | 1.90             | 3.73        | 2.56E-13   |
| <b>Putative Cyclin</b>    | SS1G_06752 | sscle_13g095140 | 1.48             | 2.80        | 1.28E-10   |
| <b>Putative cdc20</b>     | SS1G_05727 | sscle_05g047680 | 2.47             | 5.54        | 2.39E-39   |
| <b>Mcm7</b>               | SS1G_12751 | sscle_02g013150 | 1.65             | 3.14        | 1.02E-14   |
| <b>Mcm6</b>               | SS1G_13854 | sscle_10g080630 | 1.17             | 2.24        | 1.11E-13   |
| <b>Mcm4</b>               | SS1G_01278 | sscle_01g010020 | 1.00             | 2.00        | 2.57E-05   |

| Gene Name                       | ID         | ID2             | Log2 Fold Change | Fold Change | Adjusted P |
|---------------------------------|------------|-----------------|------------------|-------------|------------|
| <b>Mcm3</b>                     | SS1G_13330 | sscle_03g031590 | 1.32             | 2.50        | 7.78E-08   |
| <b>Mcm2</b>                     | SS1G_01022 | sscle_03g022630 | 1.01             | 2.01        | 4.48E-07   |
| <b>DNA repair protein XRCC4</b> | SS1G_02074 | sscle_01g003790 | 0.93             | 1.90        | 2.23E-03   |
| <b>DNA Primase subunit</b>      | SS1G_12588 | sscle_06g053650 | 1.40             | 2.63        | 7.19E-08   |
| <b>DNA polymerase</b>           | SS1G_11504 | sscle_07g060430 | 1.05             | 2.07        | 3.25E-07   |
| <b>DNA Pol ε subunit 4</b>      | SS1G_08576 | sscle_10g078390 | 0.69             | 1.61        | 6.59E-04   |
| <b>DNA Pol ε subunit 2</b>      | SS1G_05217 | sscle_08g065030 | -0.64            | -1.55       | 2.97E-02   |
| <b>DNA Pol ε subunit 1</b>      | SS1G_11933 | sscle_12g090330 | 2.09             | 4.26        | 1.01E-13   |
| <b>DNA Pol δ3</b>               | SS1G_08296 | sscle_10g076110 | 0.56             | 1.47        | 4.48E-03   |
| <b>DNA Pol δ2</b>               | SS1G_06107 | sscle_05g044800 | 0.85             | 1.80        | 2.70E-05   |
| <b>DNA helicase</b>             | SS1G_06882 | sscle_13g096070 | 2.22             | 4.65        | 9.99E-13   |
| <b>Cyclin-D-interacting</b>     | SS1G_01399 | sscle_01g009140 | 2.55             | 5.87        | 2.46E-23   |
| <b>DNA Pol II subunit 2</b>     | SS1G_05217 | sscle_08g065030 | -0.64            | -1.55       | 2.97E-02   |
| <b>Ku80</b>                     | SS1G_07128 | sscle_06g051630 | 0.54             | 1.46        | 1.38E-02   |
| <b>DNA Ligase 4</b>             | SS1G_03342 | sscle_07g057330 | 0.50             | 1.41        | 4.16E-02   |
| <b>DNA Pol4</b>                 | SS1G_06612 | sscle_13g094010 | 0.85             | 1.81        | 1.94E-03   |
| <b>Rad27</b>                    | SS1G_11175 | sscle_12g087800 | 1.14             | 2.20        | 3.22E-10   |
| <b>Whi5-like</b>                | SS1G_07309 | sscle_06g050180 | 1.17             | 2.25        | 1.19E-05   |
| <b>Whi5-like</b>                | SS1G_14043 | sscle_10g079150 | 0.72             | 1.64        | 1.02E-02   |

Table S6. Select differentially expressed genes related to ubiquitin proteolysis pathways as determined by KEGG pathway annotation. FDR adjustment cutoff  $P \leq 5.00E-2$  used for determining significance.

| Gene Name                                 | ID         | ID2             | Log2 Fold Change | Fold Change | Adjusted P |
|-------------------------------------------|------------|-----------------|------------------|-------------|------------|
| <b>Ubiquitin-activating enzyme E1 B</b>   | SS1G_02376 | sscle_04g034130 | 0.78             | 1.72        | 1.47E-03   |
| <b>Ubiquitin-conjugating enzyme E2 H</b>  | SS1G_02279 | sscle_04g033380 | -1.41            | -2.65       | 4.11E-08   |
| <b>Ubiquitin-conjugating enzyme E2 Q</b>  | SS1G_05994 | sscle_05g045680 | 1.04             | 2.06        | 1.90E-05   |
| <b>Ubiquitin-conjugating enzyme E2 Q</b>  | SS1G_05995 | sscle_05g045680 | 0.60             | 1.51        | 2.94E-02   |
| <b>Cdc20</b>                              | SS1G_05727 | sscle_05g047680 | -2.47            | -5.54       | 2.39E-39   |
| <b>Arrestin C domain-containing</b>       | SS1G_02395 | sscle_04g034280 | -1.19            | -2.27       | 3.15E-10   |
| <b>Ubiquitin</b>                          | SS1G_01873 | sscle_01g005340 | -0.95            | -1.93       | 7.00E-04   |
| <b>Ubiquitin</b>                          | SS1G_11035 | sscle_12g088930 | -0.57            | -1.49       | 1.79E-02   |
| <b>Ubiquitin-conjugating enzyme E2 G2</b> | SS1G_01502 | sscle_01g008360 | -0.99            | -1.98       | 2.62E-06   |
| <b>Ubiquitin-conjugating enzyme E2 N</b>  | SS1G_05147 | sscle_08g064560 | -0.98            | -1.97       | 1.83E-06   |
| <b>E3 ubiquitin-protein ligase RBX1</b>   | SS1G_00027 | sscle_03g030230 | -0.67            | -1.59       | 1.83E-03   |
| <b>Skp1</b>                               | SS1G_00543 | sscle_03g026230 | -0.64            | -1.56       | 1.26E-03   |

Table S7. Gene silencing pathway expression including known dicers, argonautes, and RdRps. Most differential expression FDR adjustment cutoff  $P \leq 5.00E-2$  used for determining significance.

| Gene Name    | ID         | ID2             | Log <sub>2</sub> Fold Change | Fold Change | Adjusted P |
|--------------|------------|-----------------|------------------------------|-------------|------------|
| <b>dcl-1</b> | SS1G_13747 | sscle_10g079850 | NA                           | NA          | NS         |
| <b>dcl-2</b> | SS1G_10369 | sscle_16g109590 | NA                           | NA          | NS         |
| <b>ago-2</b> | SS1G_00334 | sscle_03g027950 | NA                           | NA          | NS         |
| <b>ago-4</b> | SS1G_11723 | sscle_12g091970 | 1.02                         | 2.02        | 1.69E-04   |
| <b>SAD1</b>  | SS1G_13161 | sscle_02g020610 | -0.78                        | -1.72       | 4.09E-04   |
| <b>QDE1</b>  | SS1G_03377 | sscle_07g057040 | -0.38                        | -1.30       | 7.64E-02   |
| <b>RRP3</b>  | SS1G_09915 | sscle_01g002570 | -0.60                        | -1.52       | 7.54E-03   |

Table S8. Methylation-related genes. FDR adjustment cutoff  $P \leq 5.00E-2$  used for determining significance.

| Gene Name                                                                                                             | ID         | ID2             | Log <sub>2</sub> Fold Change | Fold Change | Adjusted P |
|-----------------------------------------------------------------------------------------------------------------------|------------|-----------------|------------------------------|-------------|------------|
| <b>ADK</b>                                                                                                            | SS1G_00597 | sscle_03g025790 | -1.79                        | -3.45       | 5.72E-32   |
| <b>SAHH</b>                                                                                                           | SS1G_01191 | sscle_01g010680 | -1.66                        | -3.16       | 1.72E-12   |
| <b>Putative DIM2</b>                                                                                                  | SS1G_07976 | sscle_11g081900 | 1.80                         | 3.49        | 1.10E-14   |
| <b>Trm82</b>                                                                                                          | SS1G_14282 | sscle_04g039750 | 0.75                         | 1.68        | 9.43E-03   |
| <b>SAM-Dependent Methyltransferase</b>                                                                                | SS1G_05223 | sscle_08g065070 | 1.90                         | 3.73        | 1.07E-07   |
| <b>SAM-dependent methyltransferase</b>                                                                                | SS1G_03467 | sscle_07g056400 | 2.37                         | 5.16        | 2.32E-43   |
| <b>SAM-dependent methyltransferase</b>                                                                                | SS1G_10584 | sscle_09g071500 | -0.48                        | -1.40       | 1.17E-02   |
| <b>Delta(14)-sterol reductase similar to polyketide synthase similar to cobalamin-independent methionine synthase</b> | SS1G_09177 | sscle_15g106990 | -2.21                        | -4.64       | 2.79E-24   |
| <b>21S rRNA (uridine(2791)-2'-O)-methyltransferase MRM2</b>                                                           | SS1G_07099 | sscle_06g051840 | 0.45                         | 1.37        | 4.23E-02   |
|                                                                                                                       | SS1G_09237 | sscle_15g106510 | 2.57                         | 5.94        | 5.25E-10   |
|                                                                                                                       | SS1G_10919 | sscle_09g068880 | 1.97                         | 3.93        | 2.26E-21   |



Table S9. pathogenesis-determinate genes. FDR adjustment cutoff  $P \leq 5.00E-2$  used for determining significance.

| Gene Name             | ID         | ID2             | Log2 Fold Change | Fold Change | Adjusted P |
|-----------------------|------------|-----------------|------------------|-------------|------------|
| <b>Endo2</b>          | SS1G_01828 | sscle_01g005720 | -3.60            | -12.13      | 7.83E-06   |
| <b>SsNep1</b>         | SS1G_03080 | sscle_04g039420 | -12.15           | -4555.19    | 6.94E-18   |
| <b>SsNep2</b>         | SS1G_11912 | sscle_12g090490 | -2.21            | -4.64       | 2.90E-12   |
| <b>SsCP1</b>          | SS1G_10096 | sscle_16g107670 | -2.24            | -4.72       | 1.01E-06   |
| <b>SsSSVP1</b>        | SS1G_02068 | sscle_01g003850 | -3.87            | -14.66      | 1.64E-07   |
| <b>SsTrx1</b>         | SS1G_08534 | sscle_10g078030 | -1.87            | -3.64       | 2.87E-07   |
| <b>Pph1</b>           | SS1G_08489 | sscle_10g077630 | -0.76            | -1.69       | 3.53E-04   |
| <b>Cry1</b>           | SS1G_05163 | sscle_08g064670 | -1.13            | -2.18       | 2.19E-02   |
| <b>PP2A subunit A</b> | SS1G_07119 | sscle_06g051720 | -0.61            | -1.53       | 3.01E-03   |

Table S10. Differential expression of genes necessary for normal sclerotial development. Melanin biosynthesis genes Scd1 and Thr1 in particular show no significant differences in regulation. Other genes related to sclerotial formation follow a similar trend of down regulation, with the exception of sop1. FDR adjustment cutoff  $P \leq 5.00E-2$  used for determining significance.

| Gene Name                                      | ID         | ID2             | Log2 Fold Change | Fold Change | Adjusted P |
|------------------------------------------------|------------|-----------------|------------------|-------------|------------|
| <b>Scd1</b>                                    | SS1G_13314 | sscle_03g031470 | NA               | NA          | NS         |
| <b>Thr1</b>                                    | SS1G_13315 | sscle_03g031480 | NA               | NA          | NS         |
| <b>Pks1</b>                                    | SS1G_13322 | sscle_03g031520 | 3.84             | 14.35       | 6.36E-23   |
| <b>Pth2</b>                                    | SS1G_13339 | sscle_03g031670 | -1.00            | -2.00       | 4.12E-07   |
| <b>CVNH-domain containing secreted protein</b> | SS1G_02904 | sscle_04g038020 | -0.93            | -1.90       | 1.30E-03   |
| <b>sl2</b>                                     | SS1G_05917 | sscle_05g046240 | -2.89            | -7.43       | 1.46E-09   |
| <b>Nox1</b>                                    | SS1G_05661 | sscle_05g048220 | -1.02            | -2.03       | 9.55E-05   |
| <b>sop1</b>                                    | SS1G_01614 | sscle_01g007450 | 2.47             | 5.54        | 1.46E-10   |
| <b>Itl2</b>                                    | SS1G_14133 | sscle_08g068500 | -2.42            | -5.36       | 2.36E-23   |
| <b>rgb1</b>                                    | SS1G_07871 | sscle_11g082700 | -0.55            | -1.46       | 1.08E-04   |
| <b>Scat1</b>                                   | SS1G_02784 | sscle_04g037170 | -0.99            | -1.98       | 4.24E-04   |
| <b>Fdh1</b>                                    | SS1G_10096 | sscle_16g107670 | -2.24            | -4.72       | 1.01E-06   |
| <b>SMR1</b>                                    | NA         | sscle_12g091490 | -1.43            | -2.70       | 7.80E-03   |

Table S11. Differentially expressed genes relating to carbohydrate metabolism. SlaGemV-1 infection leads to differential expression seen in chitinase genes important to fungal cell wall development as well as in cellulases and glycoside hydrolases used for breaking down and penetrating cell walls. Other carbohydrate genes necessary for normal metabolism are also seen differentially regulated. FDR adjustment cutoff  $P \leq 5.00E-2$  used for determining significance.

| Gene Description | ID         | ID2             | Log2 Fold Change | Fold Change | Adjusted P |
|------------------|------------|-----------------|------------------|-------------|------------|
| <b>Sshxt2</b>    | SS1G_13734 | sscle_10g079770 | -5.38            | -41.69      | 3.57E-101  |

| Gene Description                             | ID         | ID2             | Log <sub>2</sub> Fold Change | Fold Change | Adjusted P |
|----------------------------------------------|------------|-----------------|------------------------------|-------------|------------|
| <b>Sshxt1</b>                                | SS1G_04841 | sscle_08g062180 | -2.57                        | -5.92       | 5.93E-10   |
| <b>beta-fructofuranosidase</b>               | SS1G_07184 | sscle_06g051200 | -0.69                        | -1.62       | 2.54E-02   |
| <b>Cellulase</b>                             | SS1G_01828 | sscle_01g005720 | -3.59                        | -12.04      | 6.53E-06   |
| <b>Putative Endoglucanase</b>                | SS1G_00892 | sscle_03g023650 | -7.34                        | -161.51     | 4.01E-33   |
| <b>Putative glycoside hydrolase</b>          | SS1G_02334 | sscle_04g033820 | -9.34                        | -648.58     | 4.19E-29   |
| <b>Putative Cellobiohydrolase</b>            | SS1G_04945 | sscle_08g063000 | -1.04                        | -2.06       | 4.30E-02   |
| <b>Endochitinase 33</b>                      | SS1G_11212 | sscle_12g087520 | -2.15                        | -4.45       | 4.57E-11   |
| <b>CBM1 domain-containing protein</b>        | SS1G_01373 | sscle_01g009340 | -7.29                        | -156.07     | 3.45E-29   |
| <b>Putative carbohydrate esterase</b>        | SS1G_12765 | sscle_02g013030 | -2.04                        | -4.13       | 3.90E-04   |
| <b>Putative endoglucanase II</b>             | SS1G_00891 | sscle_03g023660 | -5.76                        | -54.22      | 4.78E-13   |
| <b>Putative glycoside hydrolase</b>          | SS1G_07656 | sscle_11g084420 | -11.23                       | -2396.10    | 1.23E-38   |
| <b>Mannan endo-1,4-betamannosidase</b>       | SS1G_00746 | sscle_03g024710 | -7.42                        | -171.59     | 4.38E-56   |
| <b>Endo-1,4-beta-xylanase</b>                | SS1G_03618 | sscle_09g074790 | -5.24                        | -37.91      | 6.18E-50   |
| <b>Beta-xylanase</b>                         | SS1G_12191 | sscle_05g041650 | -4.99                        | -31.76      | 1.50E-47   |
| <b>putative glucooligosaccharide oxidase</b> | SS1G_12200 | sscle_05g041720 | 1.85                         | 3.61        | 1.38E-04   |
| <b>Sschs</b>                                 | SS1G_14116 | sscle_10g079750 | 0.59                         | 1.50        | 6.32E-04   |
| <b>Endochitinase A</b>                       | SS1G_13155 | sscle_02g020660 | 1.67                         | 3.18        | 4.87E-07   |
| <b>Endochitinase B1</b>                      | SS1G_11700 | sscle_07g062010 | -3.22                        | -9.31       | 4.99E-19   |
| <b>Endochitinase B1</b>                      | SS1G_11304 | sscle_12g086860 | -2.27                        | -4.83       | 9.63E-24   |

Table S12. Oxalate biosynthesis gene oah does not show differential expression, but accumulation-related genes odc1&2 as well as metabolism related genes do show differential expression. Oxaloacetate biosynthesis as well as its acetylation into citrate also seem to be downregulated, indicating potentially less accumulation of oxalate despite no change in oah. FDR adjustment cutoff  $P \leq 5.00E-2$  used for determining significance.

| Gene Name                             | ID         | ID2             | Log <sub>2</sub> Fold Change | Fold Change | Adjusted P |
|---------------------------------------|------------|-----------------|------------------------------|-------------|------------|
| <b>Sod1</b>                           | SS1G_00699 | sscle_03g025030 | -1.23                        | -2.34       | 5.87E-13   |
| <b>Pth2</b>                           | SS1G_13339 | sscle_03g031670 | -0.32                        | -1.24       | NS         |
| <b>Nox1</b>                           | SS1G_05661 | sscle_05g048220 | 1.87                         | 3.66        | 9.15E-07   |
| <b>PAC1</b>                           | SS1G_07355 | sscle_06g049830 | 2.08                         | 4.22        | 5.47E-09   |
| <b>Odc2</b>                           | SS1G_10796 | sscle_09g069850 | -3.60                        | -12.14      | 1.65E-21   |
| <b>Oah</b>                            | SS1G_08218 | sscle_10g075560 | 0.64                         | 1.55        | NS         |
| <b>Odc1</b>                           | SS1G_08814 | sscle_14g099710 | -4.10                        | -17.16      | 2.35E-09   |
| <b>Fdh</b>                            | SS1G_09038 | sscle_14g101500 | -3.37                        | -10.30      | 6.86E-27   |
| <b>Citrate synthase</b>               | SS1G_01625 | sscle_01g007370 | -1.48                        | -2.79       | 3.20E-13   |
| <b>Citrate synthase</b>               | SS1G_04899 | sscle_08g062630 | -1.44                        | -2.72       | 1.34E-08   |
| <b>Pyruvate carboxylase</b>           | SS1G_12839 | sscle_02g012470 | -1.41                        | -2.65       | 2.13E-16   |
| <b>Malate dehydrogenase</b>           | SS1G_08975 | sscle_14g101040 | -0.93                        | -1.91       | 1.13E-06   |
| <b>Acetyl-CoA C-acetyltransferase</b> | SS1G_00464 | sscle_03g026900 | -1.17                        | -2.24       | 1.99E-05   |
| <b>Acetyl-CoA hydrolase</b>           | SS1G_03975 | sscle_09g072050 | -0.65                        | -1.57       | 5.08E-03   |

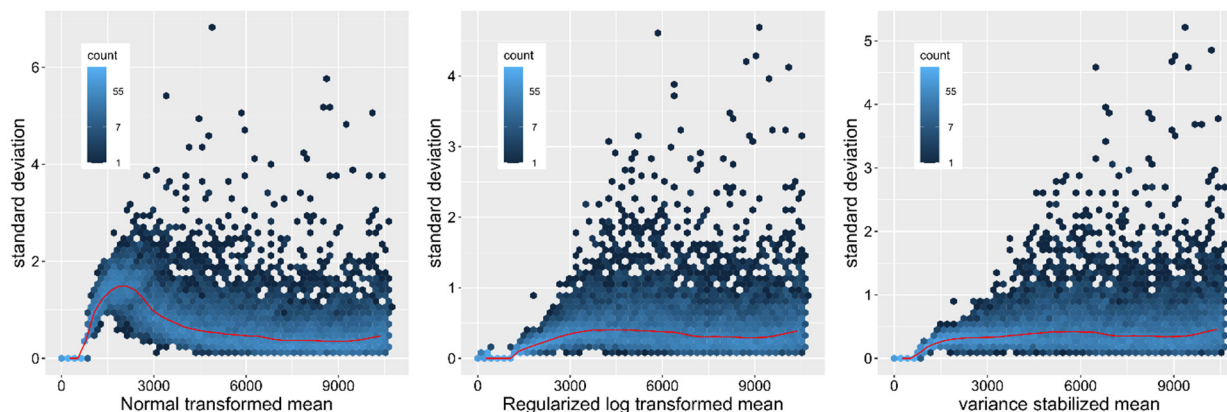

Figure S1. Three mean normalization methods included with DESeq2 for the differential expression of *S. sclerotiorum*. From left to right: normal transformation, regularized log transformation, and variance stabilization were all tested on the whole dataset. Variance stabilization was used throughout the analysis as it provided the flattest moving average line indicated in red.

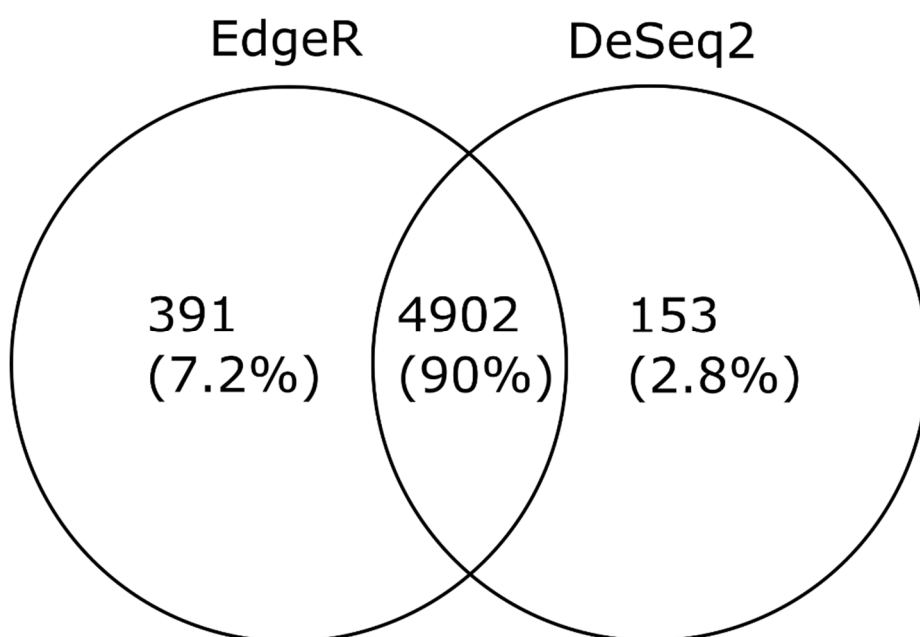

Figure S2. A second differential expression toolset was used through R called edgeR. After analysis, a venn diagram showing unique and shared differentially expressed genes in SlaGemV-1-infected DK3 determined by  $FDR \leq 0.05$  and  $LFC \leq -0.5$  or  $\geq 0.5$  using datasets determined through both DESeq2 and edgeR algorithms were compared. Further data analysis was proceeded with the DESeq2 dataset, the more stringent of the two methods.

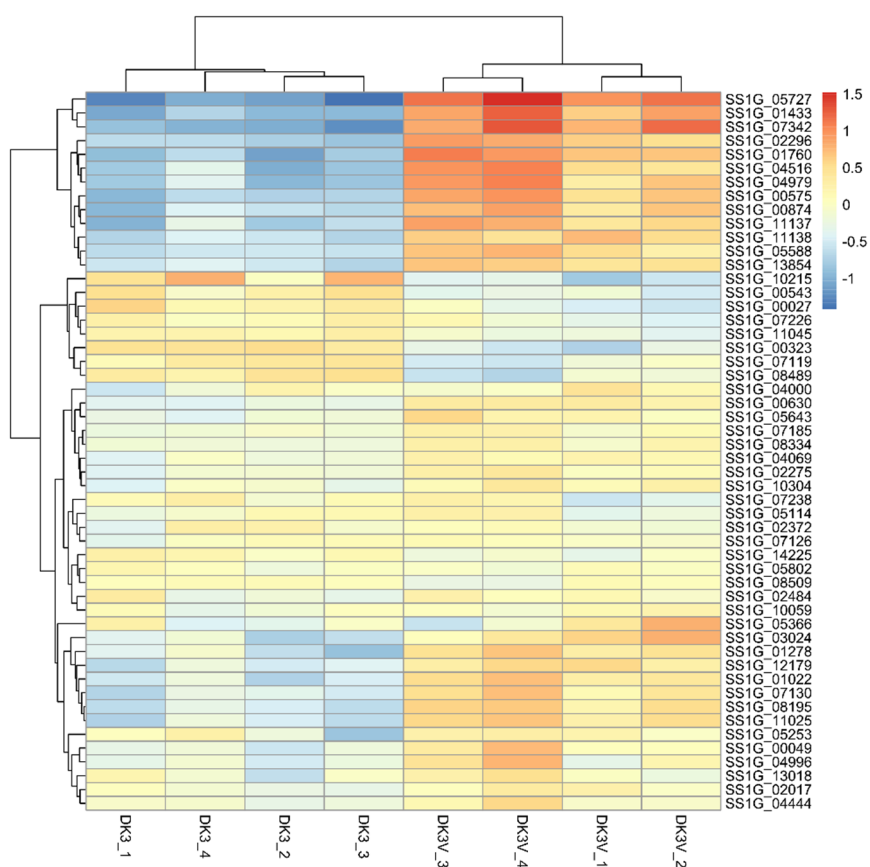

Figure S3. Distance matrix visualized by a heatmap of the differential expression of all *S. sclerotiorum* cell cycle-related genes as annotated by KEGG.

Table S13. Top and bottom 50 results from DESeq2 analysis based on log<sub>2</sub> change and a BH-calculated FDR padj ≤ 0.05.

| Gene_ID    | Mean     | log2 Change | lfcSE    | stat     | pvalue    | padj      |
|------------|----------|-------------|----------|----------|-----------|-----------|
| SS1G_08398 | 3711.038 | 5.371498    | 0.216966 | 24.75732 | 2.59E-135 | 1.17E-131 |
| SS1G_04213 | 9495.324 | 6.106237    | 0.28391  | 21.50769 | 1.32E-102 | 1.50E-99  |
| SS1G_05765 | 4932.669 | 5.993789    | 0.305674 | 19.60841 | 1.31E-85  | 1.08E-82  |
| SS1G_01102 | 5356.209 | 6.456269    | 0.340718 | 18.94903 | 4.50E-80  | 3.14E-77  |
| SS1G_01019 | 2956.356 | 5.463512    | 0.300049 | 18.2087  | 4.40E-74  | 2.85E-71  |
| SS1G_03683 | 7536.163 | 5.475883    | 0.316157 | 17.32016 | 3.31E-67  | 1.50E-64  |
| SS1G_09578 | 1117.773 | 6.172909    | 0.379701 | 16.25729 | 1.98E-59  | 6.92E-57  |
| SS1G_00702 | 5025.731 | 6.173906    | 0.426242 | 14.48452 | 1.52E-47  | 2.22E-45  |
| SS1G_08201 | 1062.936 | 5.886338    | 0.438071 | 13.43695 | 3.67E-41  | 4.22E-39  |
| SS1G_04598 | 762.9315 | 5.666355    | 0.463664 | 12.22083 | 2.41E-34  | 2.12E-32  |
| SS1G_14215 | 619.2262 | 11.9108     | 1.057393 | 11.26431 | 1.97E-29  | 1.26E-27  |
| SS1G_00703 | 5957.17  | 7.166074    | 0.657359 | 10.90131 | 1.14E-27  | 6.33E-26  |
| SS1G_01100 | 164.0309 | 6.158886    | 0.577266 | 10.66907 | 1.42E-26  | 7.05E-25  |
| SS1G_09248 | 8780.174 | 8.825342    | 0.831672 | 10.61157 | 2.63E-26  | 1.27E-24  |
| SS1G_08203 | 76.54922 | 5.966885    | 0.67567  | 8.831061 | 1.04E-18  | 2.73E-17  |
| SS1G_02694 | 945.9879 | 6.393099    | 0.734948 | 8.698707 | 3.36E-18  | 8.33E-17  |
| SS1G_02695 | 908.5815 | 7.494031    | 0.865197 | 8.661648 | 4.65E-18  | 1.14E-16  |
| SS1G_02828 | 86234.24 | 6.250257    | 0.753428 | 8.295763 | 1.08E-16  | 2.34E-15  |
| SS1G_08202 | 477.7057 | 6.360592    | 0.772938 | 8.229108 | 1.89E-16  | 4.01E-15  |
| SS1G_02692 | 90.83912 | 5.2187      | 0.657945 | 7.931822 | 2.16E-15  | 4.19E-14  |
| SS1G_00506 | 28.43463 | 8.187284    | 1.154114 | 7.094001 | 1.30E-12  | 1.87E-11  |
| SS1G_05762 | 29.83151 | 5.781272    | 0.851314 | 6.791001 | 1.11E-11  | 1.46E-10  |
| SS1G_00704 | 28.20321 | 8.175862    | 1.211776 | 6.747007 | 1.51E-11  | 1.92E-10  |
| SS1G_01654 | 38.11457 | 6.143331    | 0.946128 | 6.493132 | 8.41E-11  | 9.86E-10  |
| SS1G_05833 | 20.73129 | 5.671027    | 0.983363 | 5.766975 | 8.07E-09  | 7.32E-08  |
| SS1G_10484 | 411.6948 | 5.494802    | 0.964444 | 5.697378 | 1.22E-08  | 1.08E-07  |
| SS1G_08163 | 5116.183 | 6.166802    | 1.115177 | 5.529885 | 3.20E-08  | 2.64E-07  |
| SS1G_06089 | 25.34685 | 5.530243    | 1.087374 | 5.085872 | 3.66E-07  | 2.57E-06  |
| SS1G_05014 | 15.5509  | 5.863126    | 1.186087 | 4.94325  | 7.68E-07  | 5.11E-06  |
| SS1G_00508 | 9.619959 | 6.623117    | 1.443186 | 4.589234 | 4.45E-06  | 2.59E-05  |
| SS1G_04972 | 15.44372 | 5.856876    | 1.297115 | 4.51531  | 6.32E-06  | 3.55E-05  |
| SS1G_01532 | 13.92473 | 5.694042    | 1.281086 | 4.444698 | 8.80E-06  | 4.79E-05  |
| SS1G_13766 | 10.78119 | 6.049583    | 1.366782 | 4.42615  | 9.59E-06  | 5.18E-05  |
| SS1G_00385 | 6.846803 | 6.133026    | 1.416262 | 4.330432 | 1.49E-05  | 7.77E-05  |
| SS1G_07042 | 275.854  | 5.41447     | 1.255849 | 4.311401 | 1.62E-05  | 8.44E-05  |
| SS1G_00084 | 8.31282  | 5.667959    | 1.315166 | 4.30969  | 1.63E-05  | 8.50E-05  |
| SS1G_00548 | 6.976895 | 6.161504    | 1.456602 | 4.230053 | 2.34E-05  | 0.000117  |
| SS1G_04374 | 10.65983 | 5.284064    | 1.298363 | 4.069788 | 4.71E-05  | 0.000222  |
| SS1G_06126 | 5.627239 | 5.851019    | 1.516884 | 3.857261 | 0.000115  | 0.000498  |
| SS1G_04191 | 6.699221 | 6.100992    | 1.604716 | 3.801914 | 0.000144  | 0.000615  |

| Gene_ID    | Mean     | log2 Change | lfcSE    | stat     | pvalue    | padj      |
|------------|----------|-------------|----------|----------|-----------|-----------|
| SS1G_13505 | 1269.511 | 5.39616     | 1.449054 | 3.723918 | 0.000196  | 0.000812  |
| SS1G_05827 | 6.303466 | 6.016585    | 1.73517  | 3.467432 | 0.000525  | 0.001951  |
| SS1G_00370 | 4.694226 | 5.587615    | 1.635196 | 3.417091 | 0.000633  | 0.002305  |
| SS1G_05299 | 1437.535 | 5.923933    | 1.752756 | 3.379782 | 0.000725  | 0.002611  |
| SS1G_07361 | 4.817251 | 5.625087    | 1.714755 | 3.280402 | 0.001037  | 0.003599  |
| SS1G_13015 | 5.878855 | 5.912893    | 1.90867  | 3.097912 | 0.001949  | 0.006223  |
| SS1G_02579 | 6.365187 | 5.277851    | 1.792754 | 2.943991 | 0.00324   | 0.009736  |
| SS1G_10449 | 3.872995 | 5.312292    | 2.05389  | 2.586454 | 0.009697  | 0.025238  |
| SS1G_10071 | 8016.02  | -8.89786    | 0.373241 | -23.8394 | 1.30E-125 | 3.94E-122 |
| SS1G_13754 | 8955.365 | -5.33909    | 0.241568 | -22.1018 | 3.04E-108 | 5.52E-105 |
| SS1G_13734 | 6329.105 | -5.38176    | 0.24808  | -21.6936 | 2.36E-104 | 3.57E-101 |
| SS1G_01838 | 42875.05 | -9.77365    | 0.479214 | -20.3952 | 1.85E-92  | 1.68E-89  |
| SS1G_09251 | 17649.4  | -8.05301    | 0.462302 | -17.4194 | 5.88E-68  | 2.97E-65  |
| SS1G_00978 | 17221.87 | -6.60424    | 0.381187 | -17.3254 | 3.02E-67  | 1.44E-64  |
| SS1G_03387 | 17640.23 | -7.86727    | 0.473095 | -16.6294 | 4.27E-62  | 1.76E-59  |
| SS1G_00977 | 2284.904 | -6.41196    | 0.389828 | -16.4482 | 8.64E-61  | 3.27E-58  |
| SS1G_04946 | 55381.7  | -10.0949    | 0.618324 | -16.3263 | 6.42E-60  | 2.33E-57  |
| SS1G_00746 | 36543.67 | -7.43301    | 0.462727 | -16.0635 | 4.60E-58  | 1.44E-55  |
| SS1G_03618 | 524.3226 | -5.24979    | 0.344889 | -15.2217 | 2.54E-52  | 5.62E-50  |
| SS1G_03041 | 75882.13 | -10.8009    | 0.723401 | -14.9307 | 2.08E-50  | 3.93E-48  |
| SS1G_00892 | 55116.81 | -7.35529    | 0.493222 | -14.9127 | 2.72E-50  | 5.05E-48  |
| SS1G_13872 | 24262.96 | -5.10877    | 0.34598  | -14.7661 | 2.42E-49  | 4.07E-47  |
| SS1G_12191 | 2053.334 | -4.90681    | 0.336431 | -14.5849 | 3.51E-48  | 5.39E-46  |
| SS1G_01726 | 6699.306 | -6.231      | 0.433415 | -14.3765 | 7.27E-47  | 9.85E-45  |
| SS1G_07011 | 55080.92 | -9.00353    | 0.635974 | -14.1571 | 1.69E-45  | 2.22E-43  |
| SS1G_10065 | 7106.423 | -5.15398    | 0.390696 | -13.1918 | 9.78E-40  | 1.02E-37  |
| SS1G_05582 | 169568.5 | -5.20155    | 0.420653 | -12.3654 | 4.02E-35  | 3.65E-33  |
| SS1G_01373 | 20061.54 | -7.30435    | 0.634985 | -11.5032 | 1.27E-30  | 8.95E-29  |
| SS1G_02334 | 130765.5 | -9.34975    | 0.814486 | -11.4793 | 1.68E-30  | 1.15E-28  |
| SS1G_12118 | 2595.826 | -4.81377    | 0.428239 | -11.2409 | 2.57E-29  | 1.62E-27  |
| SS1G_13029 | 727.4983 | -5.14048    | 0.504362 | -10.1921 | 2.15E-24  | 8.72E-23  |
| SS1G_03080 | 11860.34 | -12.1533    | 1.3524   | -8.98646 | 2.55E-19  | 6.94E-18  |
| SS1G_05552 | 290.4613 | -4.743      | 0.580401 | -8.17195 | 3.03E-16  | 6.36E-15  |
| SS1G_00179 | 138.6642 | -4.85128    | 0.612664 | -7.91834 | 2.41E-15  | 4.65E-14  |
| SS1G_03909 | 87.31647 | -8.55731    | 1.122134 | -7.62592 | 2.42E-14  | 4.21E-13  |
| SS1G_00891 | 3065.408 | -5.77089    | 0.762258 | -7.57078 | 3.71E-14  | 6.34E-13  |
| SS1G_13126 | 4682.824 | -4.87108    | 0.65387  | -7.44961 | 9.36E-14  | 1.53E-12  |
| SS1G_05007 | 9158.264 | -5.69552    | 0.797116 | -7.14515 | 8.99E-13  | 1.32E-11  |
| SS1G_09391 | 31.1619  | -4.71764    | 0.676558 | -6.973   | 3.10E-12  | 4.30E-11  |
| SS1G_13141 | 31.41705 | -6.06809    | 1.105713 | -5.48794 | 4.07E-08  | 3.30E-07  |
| SS1G_00230 | 178.5538 | -7.12164    | 1.344079 | -5.29853 | 1.17E-07  | 8.79E-07  |
| SS1G_11182 | 13.77447 | -4.8589     | 0.970708 | -5.00553 | 5.57E-07  | 3.82E-06  |
| SS1G_05416 | 7.002447 | -6.36567    | 1.400685 | -4.54468 | 5.50E-06  | 3.14E-05  |

| Gene_ID    | Mean     | log2 Change | lfcSE    | stat     | pvalue   | padj     |
|------------|----------|-------------|----------|----------|----------|----------|
| SS1G_00806 | 12.72216 | -4.74567    | 1.307472 | -3.62966 | 0.000284 | 0.001131 |
| SS1G_02391 | 5.670803 | -5.30982    | 1.75015  | -3.03393 | 0.002414 | 0.007525 |
| SS1G_06289 | 3.174358 | -5.22424    | 1.740617 | -3.00137 | 0.002688 | 0.008254 |
| SS1G_13444 | 4.23214  | -5.63698    | 1.929605 | -2.92131 | 0.003486 | 0.010371 |
| SS1G_00683 | 7.260228 | -4.95318    | 1.765727 | -2.80518 | 0.005029 | 0.014248 |
| SS1G_05338 | 4.674965 | -5.78335    | 2.284276 | -2.53181 | 0.011348 | 0.02892  |

Table S14. RT-qPCR primer design

| Description                       | GeneID     | Forward                  | Reverse                 |
|-----------------------------------|------------|--------------------------|-------------------------|
| Actin-REF                         | SS1G_08733 | AGATCTTGGCTGAGCGTGGTTACA | TGACTGGCGGTTTGGATTCTTGC |
| ago-4                             | SS1G_11723 | TTATGGATGAAGCCAGGTC      | TGGTAGAGCGCATGTACTGG    |
| Cellobiohydrolase                 | SS1G_04945 | GATGTCTGGGAAGCCAATC      | CACCAGTGAAGCAGTTTGT     |
| DNA Pol $\epsilon$ subunit 2      | SS1G_05217 | TTGACTTTGACGTCGTCTGC     | CCTCTCCCTCCATCCTGT      |
| Mcm4                              | SS1G_01278 | CTGCAAAGCTGGTGACAGAG     | GAGTCCGTTGACGTGGATTT    |
| Putative DSS1                     | SS1G_01104 | CGTTGAGAACTGGAGCCAAG     | CATCGTCATCCAGCTCTCT     |
| Putative PCNA                     | SS1G_12686 | AATGGTGCTGTTACCCTTCG     | AAGGAGACCGGTTTCGGTAAG   |
| QDE1                              | SS1G_03377 | CCCTAGCGGACAAATTATCG     | ACTCTCAACGATGGCAGGAT    |
| RNase H2 subunit C                | SS1G_13856 | GTCCACCATCCAAACAATCC     | TGGGTGCAGTGTGTTTATG     |
| RRP3                              | SS1G_09915 | GAAGCTTTCAACGCAAGAGG     | CTCGATGAACCAGAGCAGTG    |
| SAD1                              | SS1G_13161 | ATTGGCTGTGGAGGAATCTG     | TTAGAGCCGGTGGAGAGAAAA   |
| TOP3                              | SS1G_12655 | TTCACACGCTTTCAGACGAC     | TGACACGACCCATAGCTCAG    |
| Ubiquitin-conjugating enzyme E2 H | SS1G_02279 | AACCTGGTCGCTATGTTCG      | CCGTGGGATTTGGATATCTG    |
| $\beta$ -fructofuranosidase       | SS1G_07184 | CTCTAGCTGGTGCCCTTCTG     | CCTGGGATAGGTGCATCAGT    |

Table S15. RT-qPCR results

| Target        | Bio Group | Control | Expression | Expression 95% CI Low | Expression 95% CI High | p-Value  |
|---------------|-----------|---------|------------|-----------------------|------------------------|----------|
| Actin-REF     | VF        | C       | N/A        | N/A                   | N/A                    | N/A      |
| Actin-REF     | VI        |         | N/A        | N/A                   | N/A                    | N/A      |
| ago4          | VF        | C       | 1.00000    | 0.35009               | 2.85643                | N/A      |
| ago4          | VI        |         | 0.43167    | 0.03125               | 5.96259                | 0.380895 |
| B-fructofrano | VF        | C       | 1.00000    | 0.50825               | 1.96755                | N/A      |
| B-fructofrano | VI        |         | 1.40563    | 0.27385               | 7.21484                | 0.562905 |
| Cellobiohydro | VF        | C       | 1.00000    | 0.26797               | 3.73179                | N/A      |
| Cellobiohydro | VI        |         | 1.74191    | 0.14422               | 21.03867               | 0.553905 |
| DSS1          | VF        | C       | 1.00000    | 0.25982               | 3.84886                | N/A      |
| DSS1          | VI        |         | 0.99284    | 0.31992               | 3.08118                | 0.990052 |
| MCM4          | VF        | C       | 1.00000    | 0.31369               | 3.18787                | N/A      |
| MCM4          | VI        |         | 1.02862    | 0.01964               | 53.87070               | 0.983337 |
| PCNA          | VF        | C       | 1.00000    | 0.31233               | 3.20176                | N/A      |
| PCNA          | VI        |         | 1.15122    | 0.07931               | 16.71109               | 0.882949 |
| Pol-e         | VF        | C       | 1.00000    | 0.29726               | 3.36405                | N/A      |
| Pol-e         | VI        |         | 0.43810    | 0.00086               | 222.11502              | 0.551193 |

| Target        | Bio Group | Control | Expression | Expression 95% CI Low | Expression 95% CI High | p-Value  |
|---------------|-----------|---------|------------|-----------------------|------------------------|----------|
| QDE1          | VF        | C       | 1.00000    | 0.21638               | 4.62151                | N/A      |
| QDE1          | VI        |         | 0.45557    | 0.04407               | 4.70888                | 0.404776 |
| RNase H2C     | VF        | C       | 1.00000    | 0.39013               | 2.56325                | N/A      |
| RNase H2C     | VI        |         | 0.78842    | 0.08261               | 7.52474                | 0.767408 |
| RRP3          | VF        | C       | 1.00000    | 0.35709               | 2.80042                | N/A      |
| RRP3          | VI        |         | 0.80875    | 0.06067               | 10.78112               | 0.816577 |
| SAD1          | VF        | C       | 1.00000    | 0.50863               | 1.96607                | N/A      |
| SAD1          | VI        |         | 0.35947    | 0.00446               | 28.96856               | 0.491102 |
| TOP3          | VF        | C       | 1.00000    | 0.18504               | 5.40418                | N/A      |
| TOP3          | VI        |         | 1.46181    | 0.15082               | 14.16841               | 0.684242 |
| Ubiquitin E2H | VF        | C       | 1.00000    | 0.19435               | 5.14545                | N/A      |
| Ubiquitin E2H | VI        |         | 1.30023    | 0.61619               | 2.74361                | 0.658937 |
| Ubiquitin-REF | VF        | C       | 1.00000    | 0.45682               | 2.18906                | N/A      |
| Ubiquitin-REF | VI        |         | 1.00598    | 0.35062               | 2.88629                | 0.988939 |
